# Supplementary material for: Assessing the role of two populations of Aedes japonicus japonicus for Zika virus transmission under a constant and a fluctuating temperature regime
Source: PubMed Central journal article supplement (PMC7501641; doi:10.1186/s13071-020-04361-2), 2020-09-18

**Additional file 1: Figure S1.** Rates of infection, dissemination and transmission for two populations (Zürich, Switzerland, and Steinbach, France) of *Aedes japonicus* incubated at two different temperature regimes (constant 27 °C and fluctuating 21±7 °C). Error bars represent the 95% confidence intervals.

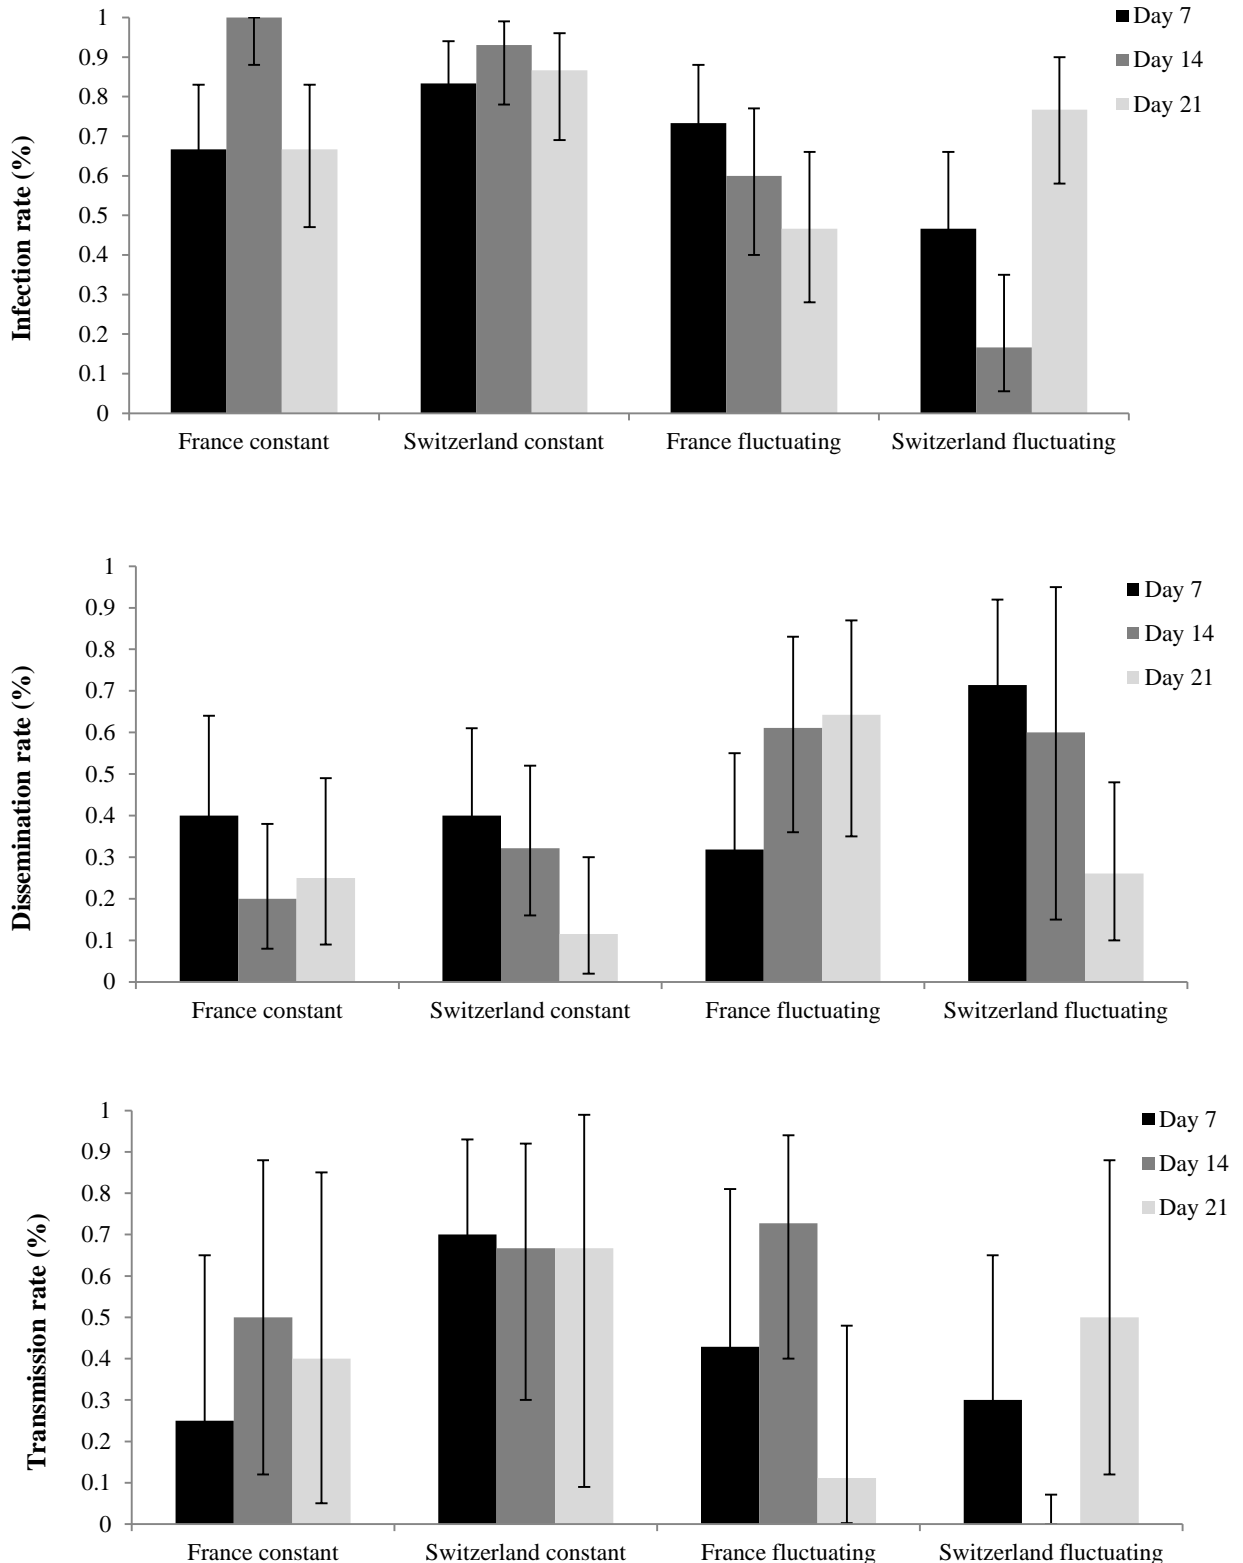

Supplement: 13071_2020_4361_MOESM1_ESM.pdf [file 13071_2020_4361_MOESM1_ESM.pdf]
